# Supplementary material for: Discordance of PIK3CA mutational status between primary and metastatic breast cancer: a systematic review and meta-analysis
Source: PubMed Central journal article supplement (PMC10361863; doi:10.1007/s10549-023-07010-1), 2023-07-01
Supplement: 10549_2023_7010_MOESM1_ESM.pdf [file 10549_2023_7010_MOESM1_ESM.pdf]

**Supplementary material to:**

**Discordance of PIK3CA mutational status between primary and metastatic breast cancer: A systematic review and meta-analysis**

Justus Rosin<sup>1\*</sup>, Ella Svegrup<sup>1\*</sup>, Antonios Valachis<sup>2#</sup>, Ioannis Zerdes<sup>3,4#</sup>

**Authors' affiliations:** 1. School of Medical Sciences, Örebro University, Örebro, Sweden; 2. Department of Oncology, Faculty of Medicine and Health, Örebro University Hospital, Örebro University, Örebro, Sweden; 3. Department of Oncology-Pathology, Karolinska Institutet, Stockholm, Sweden; 4. Breast Cancer Centre, Theme Cancer, Karolinska University Hospital, Stockholm, Sweden

\* These authors contributed equally to the work

# These authors jointly supervised the work

**Total number of supplementary-only material:** 1 Supplementary Figure and Supplementary Methods

**Supplementary Methods:** Searching strategy in PubMed/Web of Science and Embase

**A) PubMed/Web of Science**

| Search terms                                            |                                                                                                                                                                                      | Items found |
|---------------------------------------------------------|--------------------------------------------------------------------------------------------------------------------------------------------------------------------------------------|-------------|
| <b>Population: Primary and metastatic breast cancer</b> |                                                                                                                                                                                      |             |
| 1                                                       | (breast cancer*[Title/Abstract]) OR (breast malignan*[Title/Abstract]) OR (breast neoplas*[Title/Abstract]) OR (breast carcinoma*[Title/Abstract]) OR (breast tumo*[Title/Abstract]) | 363,248     |
| 2                                                       | (metasta*[Title/Abstract]) OR (primary[Title/Abstract]) OR (secondary[Title/Abstract]) OR (disseminated[Title/Abstract])                                                             | 2,886,289   |
| 1 AND 2                                                 |                                                                                                                                                                                      | 154,702     |
| <b>Exposure: PIK3CA</b>                                 |                                                                                                                                                                                      |             |
| 3                                                       | PIK3CA                                                                                                                                                                               | 6,967       |
| Combined sets                                           |                                                                                                                                                                                      |             |
| 1 AND 2 AND 3                                           |                                                                                                                                                                                      | 832         |

Searching strategy:

PIK3CA[Title/Abstract] AND ((breast cancer\*[Title/Abstract]) OR (breast malignan\*[Title/Abstract]) OR (breast neoplas\*[Title/Abstract]) OR (breast carcinoma\*[Title/Abstract]) OR (breast tumo\*[Title/Abstract])) AND ((metasta\*[Title/Abstract]) OR (primary[Title/Abstract]) OR (secondary[Title/Abstract]) OR (disseminated[Title/Abstract]))

**B) Embase**

| No. | Query                                                                                                                              | Results |
|-----|------------------------------------------------------------------------------------------------------------------------------------|---------|
| #7  | #5 NOT #6                                                                                                                          | 623     |
| #6  | #3 AND #4 AND ([conference abstract]/lim OR [conference paper]/lim OR [conference review]/lim)                                     | 1241    |
| #5  | #3 AND #4                                                                                                                          | 1864    |
| #4  | pik3ca:ti,ab                                                                                                                       | 14587   |
| #3  | #1 AND #2                                                                                                                          | 172958  |
| #2  | metasta*:ti,ab OR primary:ti,ab OR secondary:ti,ab OR disseminated:ti,ab                                                           | 3997986 |
| #1  | 'breast cancer*':ti,ab OR 'breast malignan*':ti,ab OR 'breast neoplas*':ti,ab OR 'breast carcinoma*':ti,ab OR 'breast tumo*':ti,ab | 510930  |

## Supplementary Figure Legends

**Supplementary Figure 1.** Funnel plots assessing publication bias, for studies reporting *PIK3CA* mutational status pooled discordance rates. A. Overall discordance rate; B. Overall discordance rate from *PIK3CA*-mutated to *PIK3CA*-wild-type; C. Overall discordance rate from *PIK3CA*-wild-type to *PIK3CA*-mutated
